# Supplementary material for: G12/13-mediated signaling stimulates hepatic glucose production and has a major impact on whole body glucose homeostasis
Source: PubMed Central journal article supplement (PMC11574106; doi:10.1038/s41467-024-54299-7), 2024-11-19
Supplement: 41467_2024_54299_MOESM1_ESM.pdf [file 41467_2024_54299_MOESM1_ESM.pdf]

## Supplemental Information

### **G<sub>12/13</sub>-mediated signaling stimulates hepatic glucose production and has a major impact on whole body glucose homeostasis**

Srinivas Pittala<sup>1</sup>, Dhanush Haspula<sup>1</sup>, Yinghong Cui<sup>1</sup>, Won-Mo Yang<sup>2</sup>, Young-Bum Kim<sup>2</sup>, Roger J. Davis<sup>3</sup>, Allison Wing<sup>4</sup>, Yaron Rotman<sup>4</sup>, Owen P. McGuinness<sup>5</sup>, Asuka Inoue<sup>6</sup>, and Jürgen Wess<sup>1</sup>

<sup>1</sup>Molecular Signaling Section, Laboratory of Bioorganic Chemistry, NIDDK, NIH, Bethesda, MD, USA

<sup>2</sup>Division of Endocrinology, Diabetes, and Metabolism, Beth Israel Deaconess Medical Center and Harvard Medical School, Boston, MA, USA

<sup>3</sup>Program in Molecular Medicine, University of Massachusetts Chan Medical School, Worcester, MA, USA

<sup>4</sup>Liver & Energy Metabolism Section, Liver Diseases Branch, NIDDK, NIH, Bethesda, MD, USA

<sup>5</sup>Departments of Molecular Physiology and Biophysics, Vanderbilt University Medical Center, Nashville, TN, USA

<sup>6</sup>Graduate School of Pharmaceutical Sciences, Tohoku University, Sendai, Miyagi, 980-8578, Japan

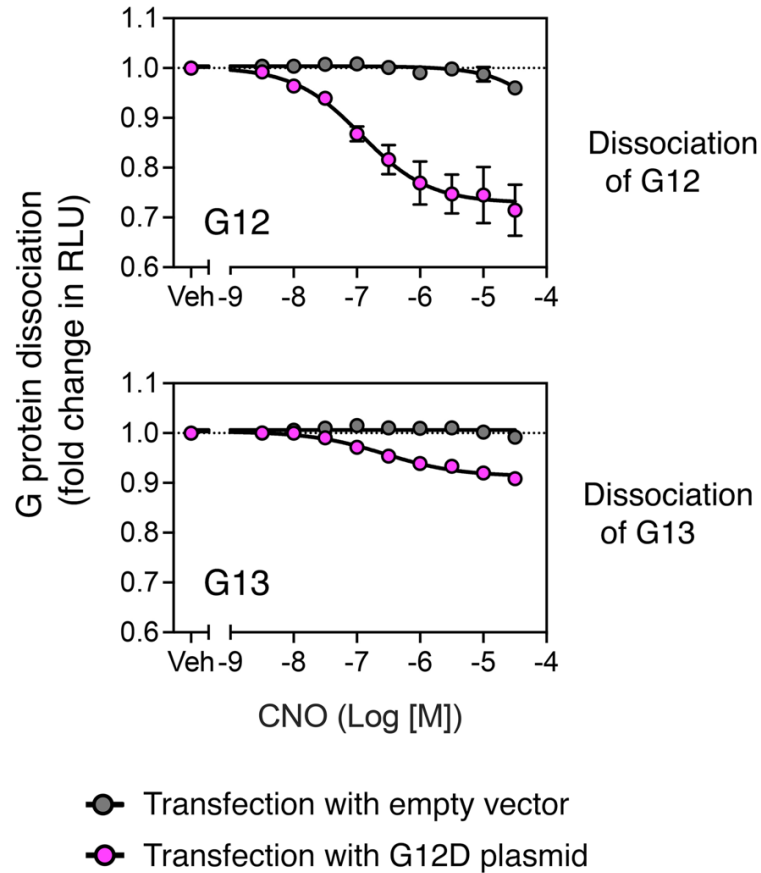

**Supplementary Fig. 1. CNO treatment of G12D-expressing HEK293A cells activates both G<sub>12</sub> and G<sub>13</sub>.** CNO-induced activation of G<sub>12</sub> and G<sub>13</sub> in HEK293A cells expressing the G12D designer GPCR<sup>1</sup>. G12D-mediated dissociation of G protein heterotrimers was measured by employing a highly sensitive NanoBiT-G protein dissociation assay (see Methods for details)<sup>2</sup>. Data are presented as means ± s.e.m. obtained in 3-5 independent experiments. Veh, vehicle; RLU, relative luminescence units. Source data are provided as a Source Data file.

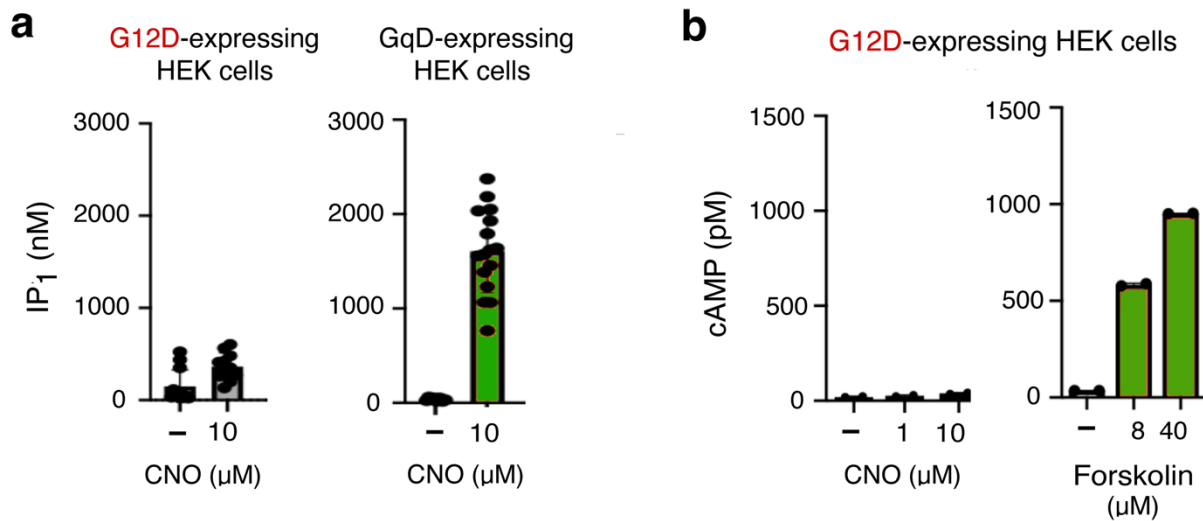

**Supplementary Fig. 2.** CNO treatment of G12D-expressing HEK293A cells does not lead to increased intracellular inositol monophosphate (IP<sub>1</sub>) and cAMP levels. **a, b**, G12D-expressing HEK293A cells were incubated with the indicated concentrations of CNO or forskolin for 30 min, and changes in cytosolic IP<sub>1</sub> (**a**) and cAMP (**b**) levels were determined (see Methods for details). For control purposes, we also studied HEK293A cells expressing a Gq<sub>11</sub>-coupled DREADD (hM3Dq; alternative name: GqD)<sup>3</sup> (**a**). Data are presented as means ± s.e.m. obtained in three independent experiments. Source data are provided as a Source Data file.

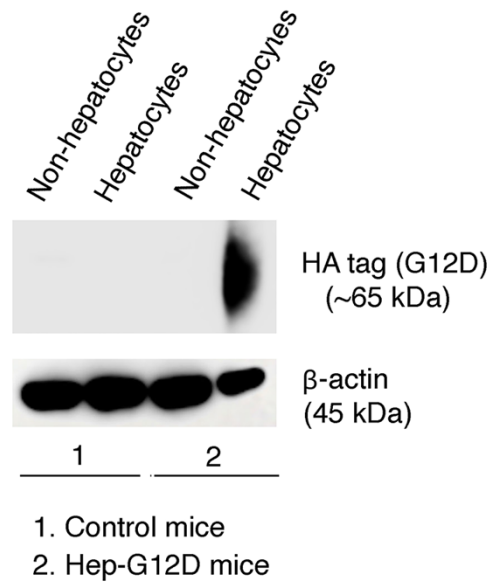

**Supplementary Fig. 3. Selective expression of the G12D designer receptor in hepatocytes of Hep-G12D mice.** Hepatocytes were prepared from Hep-G12D mice and control littermates and separated from other liver cells (Kupffer cells, stellate cells, etc.). Western blotting studies with cell lysates showed that G12D was selectively expressed in hepatocytes of Hep-G12D mice. The G12D protein was detected by using an anti-HA antibody targeting the HA epitope fused to the extracellular N-terminus of G12D (Fig. 1a). A representative blot is shown. Two additional experiments gave similar results. Source data are provided as a Source Data file.

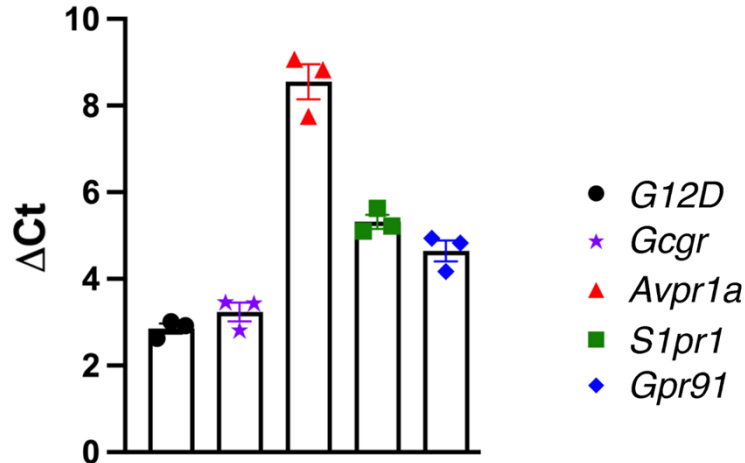

**Supplementary Fig. 4.** Quantification of hepatic expression levels of *G12D* and several GPCRs endogenously expressed by mouse hepatocytes. RNA prepared from primary hepatocytes derived from Hep-*G12D* mice was subjected to qRT-PCR analysis using receptor-specific primers. We compared the expression of *G12D* with that of the following GPCRs (gene names in parentheses): glucagon receptor (*Gcgr*),  $V_{1A}$  vasopressin receptor (*Avpr1a*), sphingosine 1-phosphate receptor subtype 1 (*S1pr1*), and *Gpr91* (*Sucnr1*). Expression data were normalized relative to the expression of  $\beta$ -actin (internal control). Note that lower  $\Delta C_t$  values correspond to higher transcript levels. Data are presented as means  $\pm$  s.e.m. obtained in three independent experiments. Source data are provided as a Source Data file.

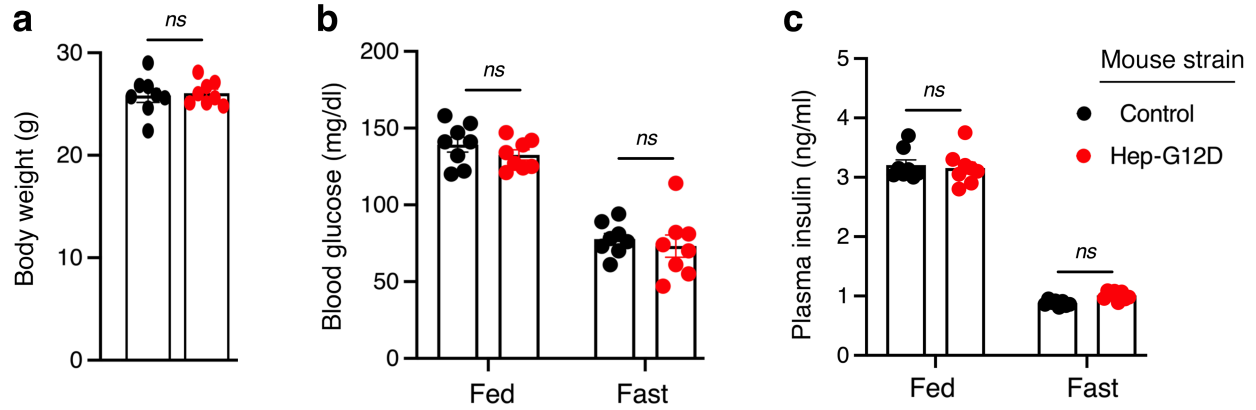

**Supplementary Fig. 5. Studies with Hep-G12D mice and control littermates in the absence of CNO.** Metabolic measurements performed with Hep-G12D mice and control littermates maintained on regular chow in the absence of CNO. **a**, Body weight (age: 8 weeks). **b**, **c**, Blood glucose (b) and plasma insulin (c) levels in mice that had free access to food or after a 14 hr overnight fast. All studies were performed using 8-9-week-old male mice. Data represent means  $\pm$  s.e.m. ( $n=8$ /group). *ns*, no statistically significant difference (two-tailed Student's *t* test [a] or 2-way ANOVA followed by Bonferroni's post-hoc test [b, c]). Source data are provided as a Source Data file.

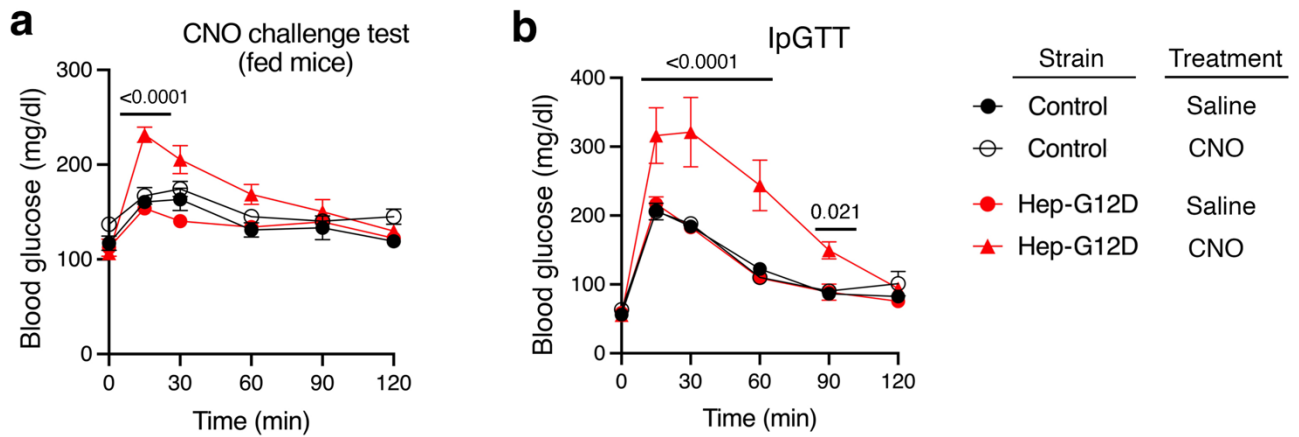

**Supplementary Fig. 6. In vivo metabolic studies with female Hep-G12D mice.** In vivo metabolic tests were performed with female Hep-G12D mice and control littermates (age: 3-4 months) maintained on regular chow. **a**, CNO challenge test. Freely fed mice were injected i. p. with CNO (3 mg/kg) or saline, followed by monitoring of blood glucose levels. **b**, I.p. glucose tolerance test (IpGTT, 2 g glucose/kg). Data represent means  $\pm$  s.e.m. (n=8 mice/group). Numbers above horizontal bars refer to p values. Statistical significance was determined by 2-way ANOVA followed by Bonferroni's post-hoc test. Source data are provided as a Source Data file.

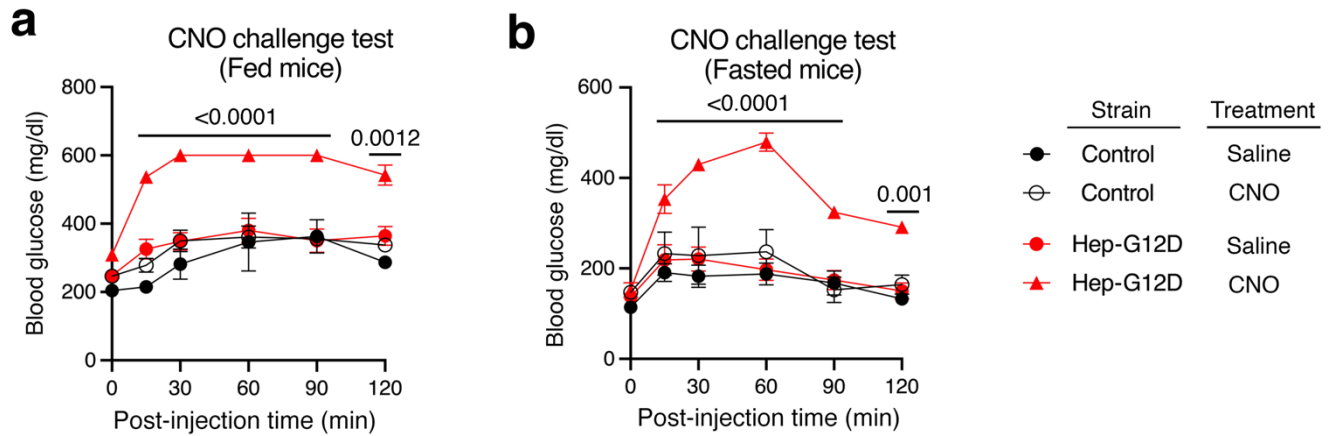

**Supplementary Fig. 7. CNO treatment of Hep-G12D mice maintained on a high fat diet.**

**a, b**, CNO challenge tests. Hep-G12D mice and control littermates were maintained on a high fat diet for at least 8 weeks. Mice that had free access to food (**a**) or that had been fasted overnight for 12 hr (**b**) were injected i. p. with CNO (3 mg/kg) or saline, followed by the monitoring of blood glucose levels. Studies were performed using male mice (mouse age: 16-17 weeks). Data represent means  $\pm$  s.e.m. (n=8 mice/group). Numbers above horizontal bars refer to p values. Statistical significance was determined 2-way ANOVA followed by Bonferroni's post-hoc test. Source data are provided as a Source Data file.



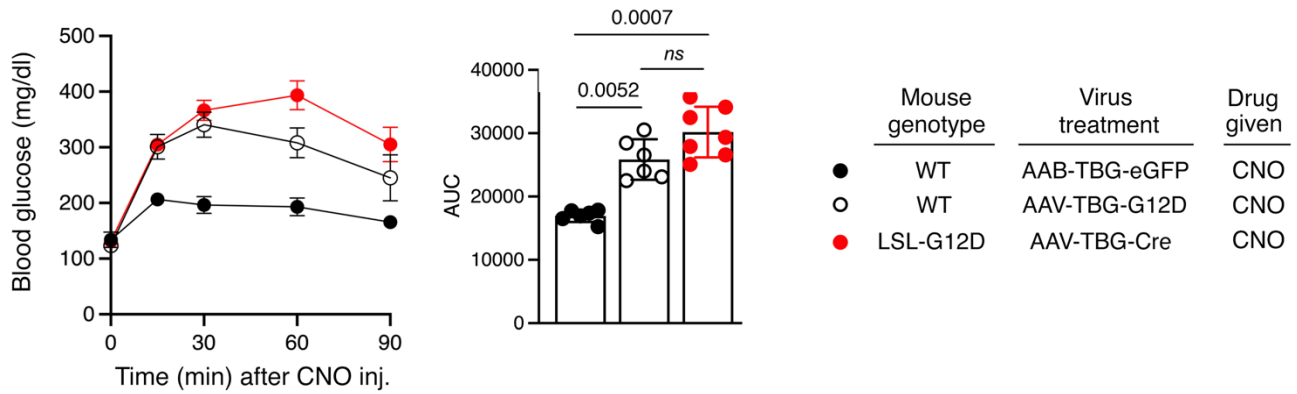

**Supplementary Fig. 8. Hyperglycemic responses after ligand activation of the G12D**

**designer receptor expressed in mouse hepatocytes.** The G12D construct was expressed selectively in mouse hepatocytes by using two related strategies. One approach involved the treatment of LSL-G12D mice with the AAV-TBG-Cre virus. The second strategy involved the treatment of WT mice with the AAV- TBG-G12D virus (see Methods for details). The resulting mice showed comparable increases in blood glucose levels following the i.p. jection of CNO (3 mg/kg). Studies were performed using 8-week-old male mice consuming regular chow diet. Data are given means  $\pm$  s.e.m. (n=8 mice/group). Numbers above horizontal bars refer to p values (2-way ANOVA followed by Bonferroni’s post-hoc test). ns, no statistically significant difference. Source data are provided as a Source Data file.

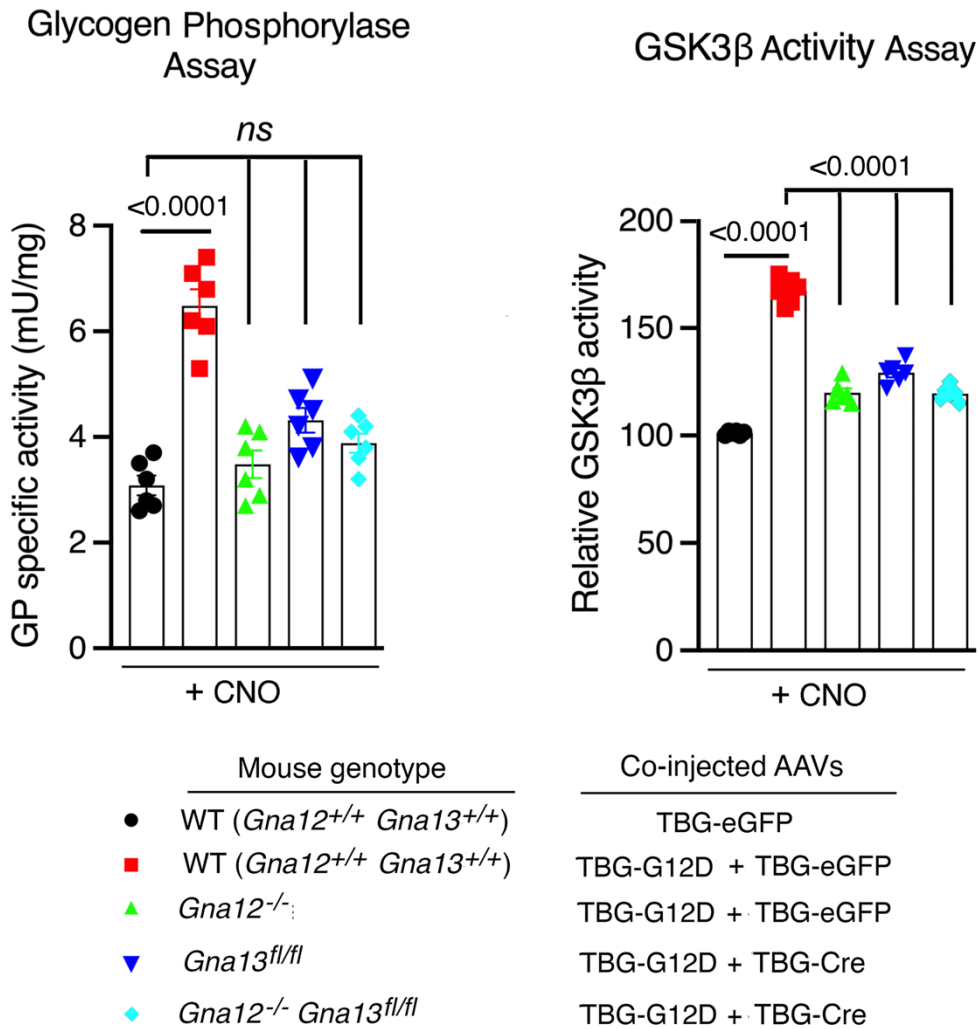

**Supplementary Fig. 9. Both G<sub>12</sub> and G<sub>13</sub> signaling contribute to G12D-mediated stimulation of hepatic glycogenolysis.** Livers were harvested from the indicated mouse strains 30 min after CNO treatment (3 mg/kg, i.p.) 14-week-old males). The activities of hepatic glycogen phosphorylase (GP) and Gsk3β, two enzymes that play central roles in promoting glycogenolysis, were determined using liver lysates. Data are given means ± s.e.m. (n=6). Numbers above horizontal bars refer to p values (2-way ANOVA followed by Bonferroni's post-hoc test). Source data are provided as a Source Data file.

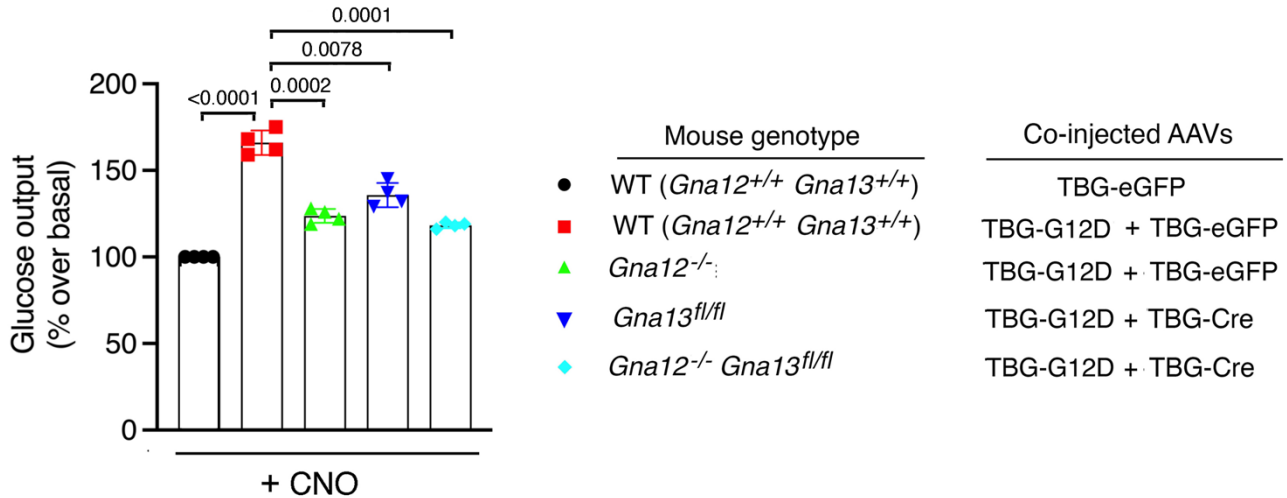

**Supplementary Fig. 10. Both G<sub>12</sub> and G<sub>13</sub> signaling contribute to G12D-mediated stimulation of hepatic gluconeogenesis.** We collected hepatocytes from livers of the indicated mouse strains 30 min after CNO treatment (3 mg/kg, i.p.) (14-week-old males). To monitor gluconeogenesis, we incubated hepatocytes in the presence of CNO (10 μM) and high concentrations of two major gluconeogenic substrates (20 mM sodium lactate and 2 mM sodium pyruvate, respectively) and measured the amount of glucose released into the medium. Data are given means ± s.e.m. (n=4). Numbers above horizontal bars refer to p values (2-way ANOVA followed by Bonferroni's post-hoc test). Source data are provided as a Source Data file.

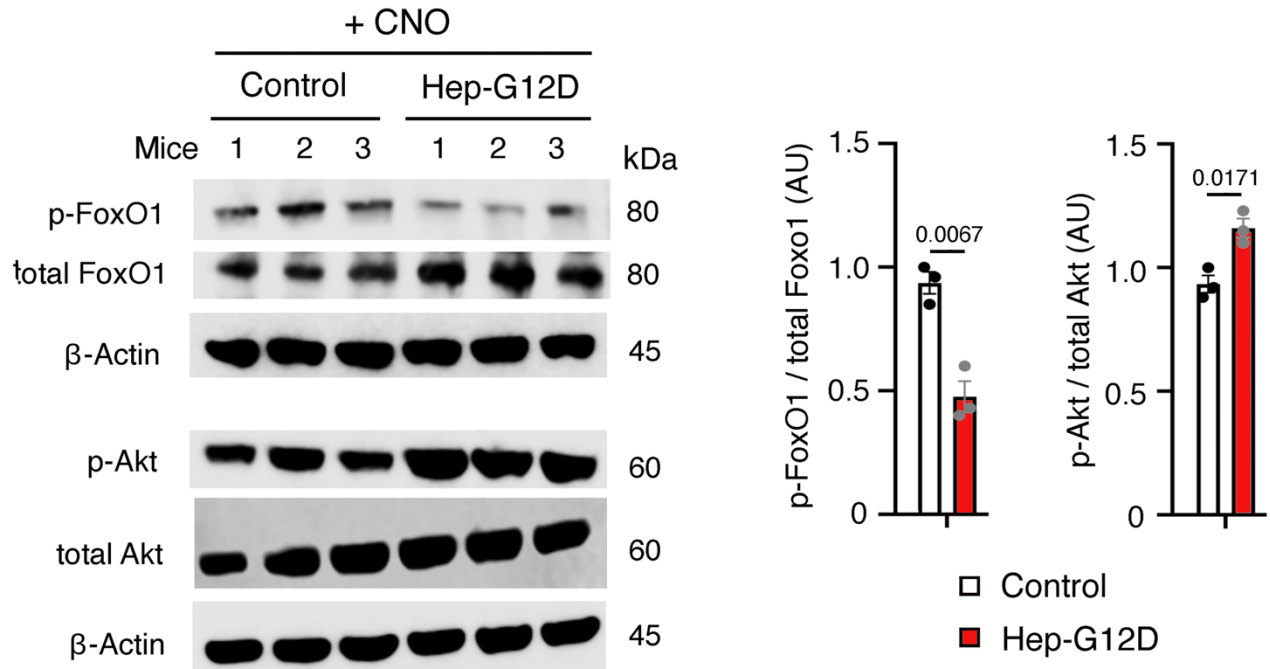

**Supplementary Fig. 11.** Activation of G12D expressed by mouse hepatocytes promotes the dephosphorylation of pFoxO1. HepG12D mice and control littermates (16-week-old males) were injected with CNO (3 mg/kg, i.p.). Thirty min later, mice were euthanized, and liver lysates were prepared and subjected to Western blotting studies using the indicated antibodies. Note that CNO treatment of Hep-G12D mice caused a marked reduction in hepatic pFoxO1 levels. pAkt (T308) was slightly elevated in Hep-G12D mice, most likely due to enhanced insulin secretion following CNO-induced hyperglycemia (see text for details). Western blotting data are quantified in the bar diagrams to the right (n=3 mice per group). Data represent means  $\pm$  s.e.m. Numbers above horizontal bars refer to p values (two-tailed Student's t test). Source data are provided as a Source Data file.

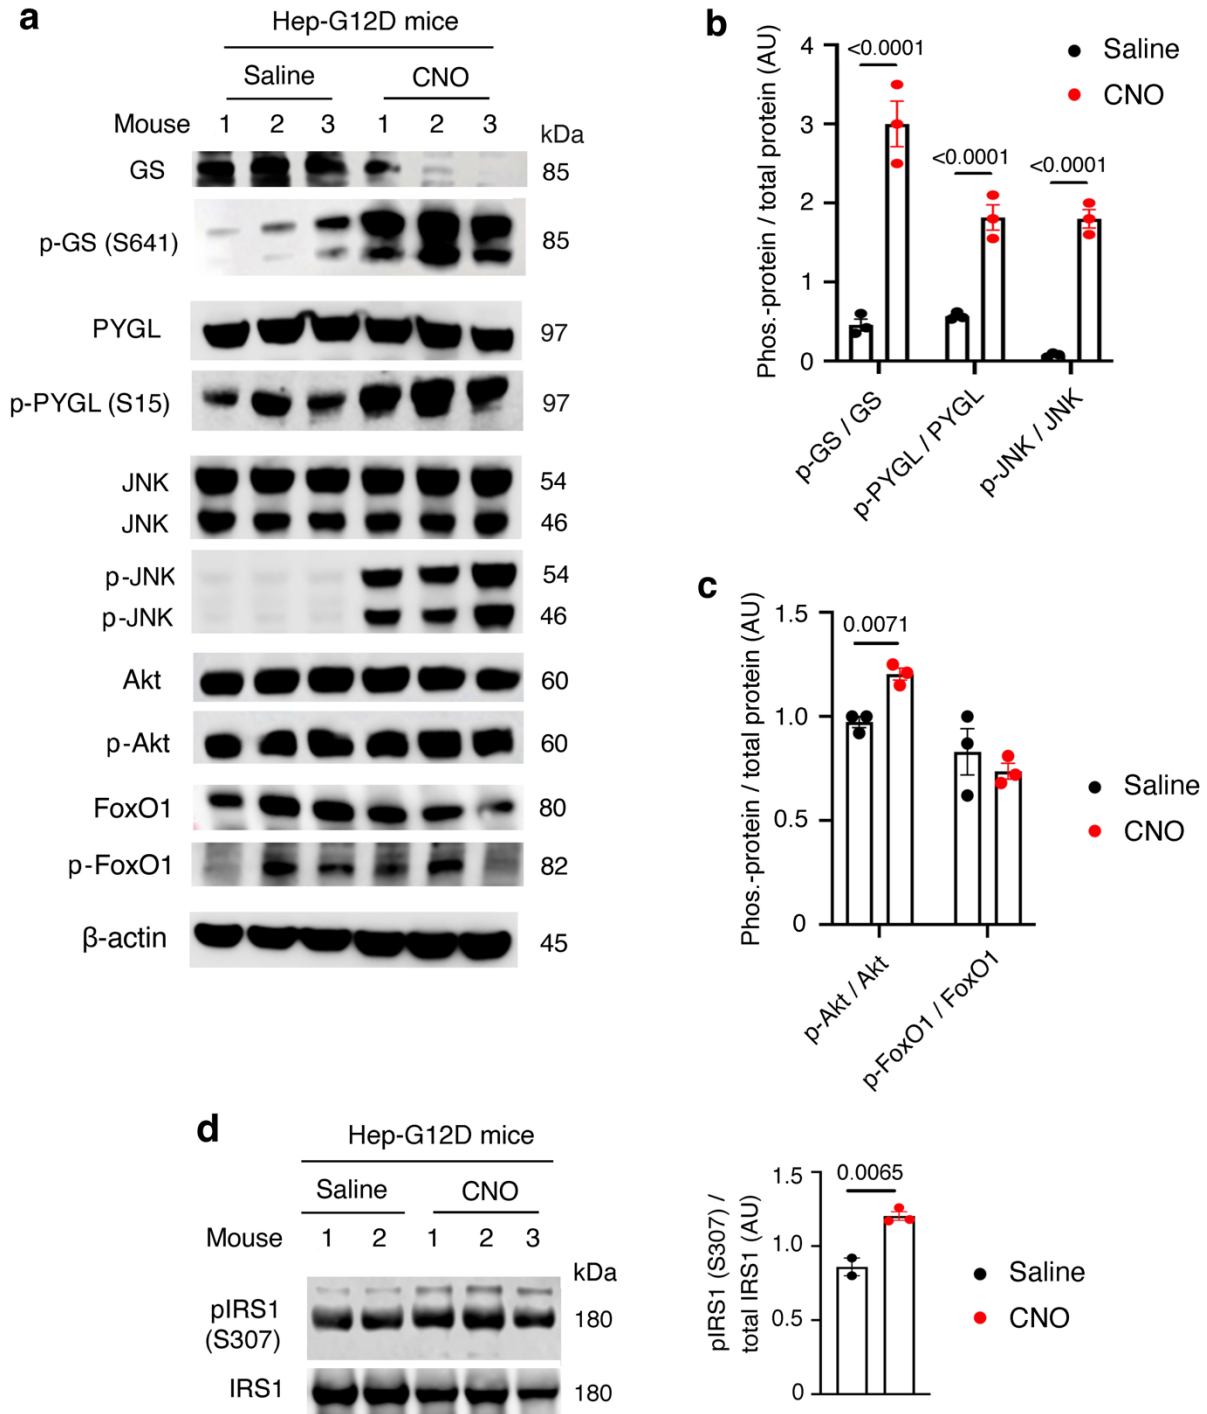

**Supplementary Fig. 12. Activation of G12D expressed by mouse hepatocytes rapidly promotes the phosphorylation of key enzymes and signaling proteins..** HepG12D mice were injected i.v. with either saline or CNO (3 mg/kg). Five min later, mice were euthanized, and liver lysates were prepared and subjected to Western blotting studies. **a, b**, CNO-mediated activation

of G12D led to the rapid phosphorylation of liver glycogen synthase (GS) at position S641 and liver glycogen phosphorylase (PYGL) at position S15, respectively. While pJNK was barely detectable in livers from saline-treated Hep-G12D mice, CNO treatment led to a striking increase in hepatic pJNK formation. **a, c**, CNO-mediated stimulation of G12D had only relatively minor effects on the phosphorylation status of Akt (T308) and FoxO1, two major signaling proteins of the insulin receptor signaling cascade. **d**, CNO treatment of HepG12D mice promoted the phosphorylation of IRS1 at position S307, a target of JNK. Western blotting data are quantified in the bar diagrams. The data shown in the bar graphs represent means  $\pm$  s.e.m. Numbers above horizontal bars refer to p values (2-way ANOVA followed by Bonferroni's post-hoc test (**b, c**) or two-tailed Student's t test (**d**)). Source data are provided as a Source Data file.

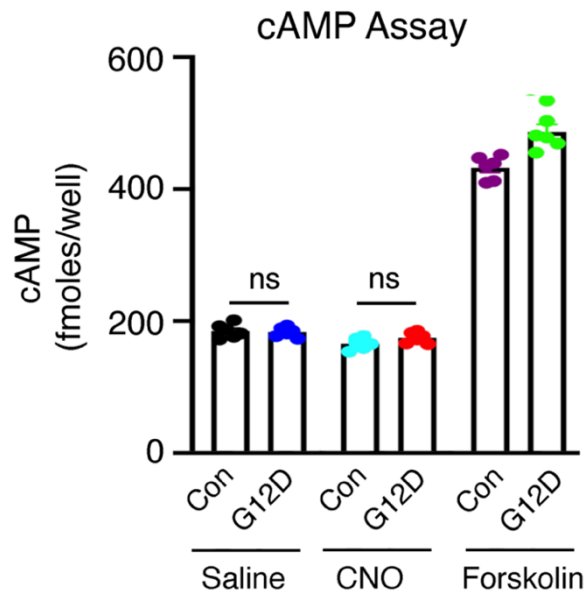

**Supplementary Fig. 13. CNO treatment of Hep-G12D hepatocytes has no effect on intracellular cAMP levels.** CNO treatment (10  $\mu$ M) of primary hepatocytes prepared from Hep-G12D mice and control littermates (14-week-old males) has no significant effect on intracellular cAMP levels. As expected, incubation with forskolin (10  $\mu$ M) resulted in a pronounced increase in cytoplasmic cAMP levels (positive control). Cells were incubated with drugs for 30 min. Data are presented as means  $\pm$  s.e.m. (n=6). ns, no statistically significant difference. Source data are provided as a Source Data file.

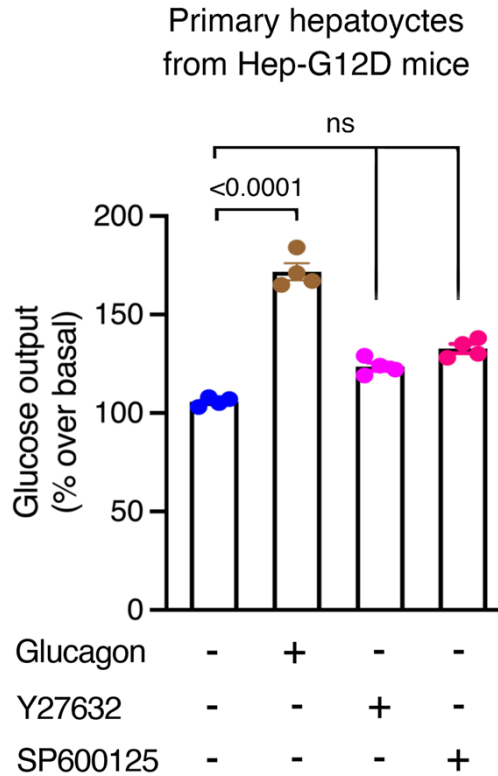

**Supplementary 14. Glucose output assays carried out with primary mouse G12D hepatocytes.** Primary hepatocytes prepared from Hep-G12D mice were incubated in the presence of glucagon (100 nM; positive control), Y-27632 (10  $\mu$ M, ROCK inhibitor), or SP600125 (10  $\mu$ M, JNK inhibitor). Glucose release into the medium was examined 6 hr later (see Methods for details). Note that treatment with Y-27632 or SP600125 alone had no significant effect on glucose output. Data are given means  $\pm$  s.e.m. from four independent experiments. Numbers above horizontal bars refer to p values (2-way ANOVA followed by Bonferroni's post-hoc test). ns, no statistically significant difference. Source data are provided as a Source Data file.



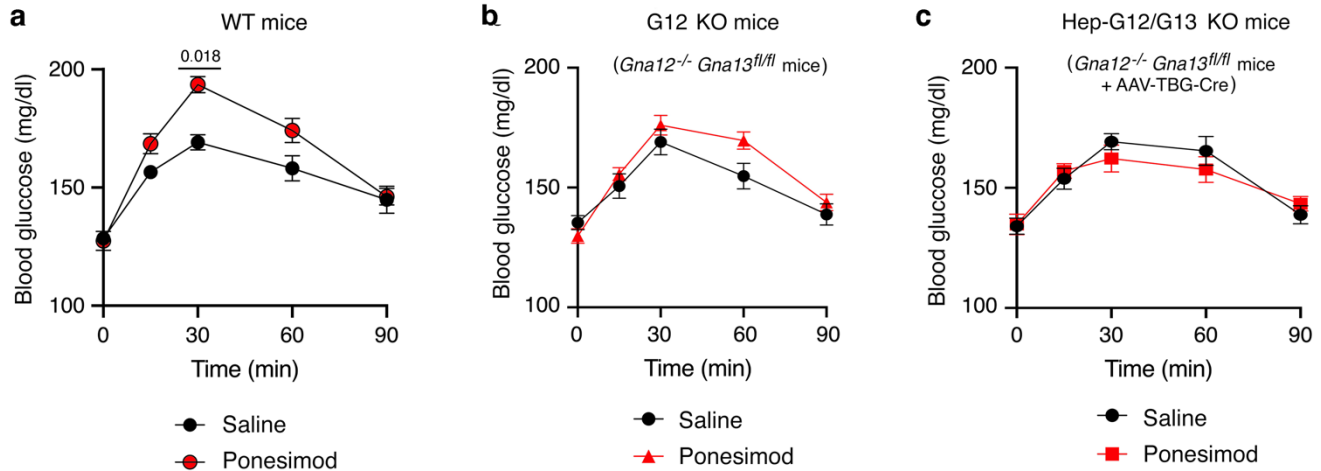

**Supplementary Fig. 15. Ponesimod-induced increases in blood glucose levels require  $G_{12/13}$  signaling.** **a-c**, Mice (12-14-week-old males) of the indicated genotypes (diet: regular chow) received a single i.p. injection of either saline or ponesimod (20 mg/kg), a selective S1PR1 agonist. Blood glucose levels were determined at the indicated post-injection times.

**a**, WT mice. **b**, Mice lacking  $G\alpha_{12}$  (whole body). **c**, Mice deficient in both  $G\alpha_{12}$  (whole body) and  $G\alpha_{13}$  (hepatocytes only). Data are given as means  $\pm$  s.e.m. (n=5 mice/group). Numbers above horizontal bars refer to p values (2-way ANOVA followed by Bonferroni's post-hoc test). Source data are provided as a Source Data file.

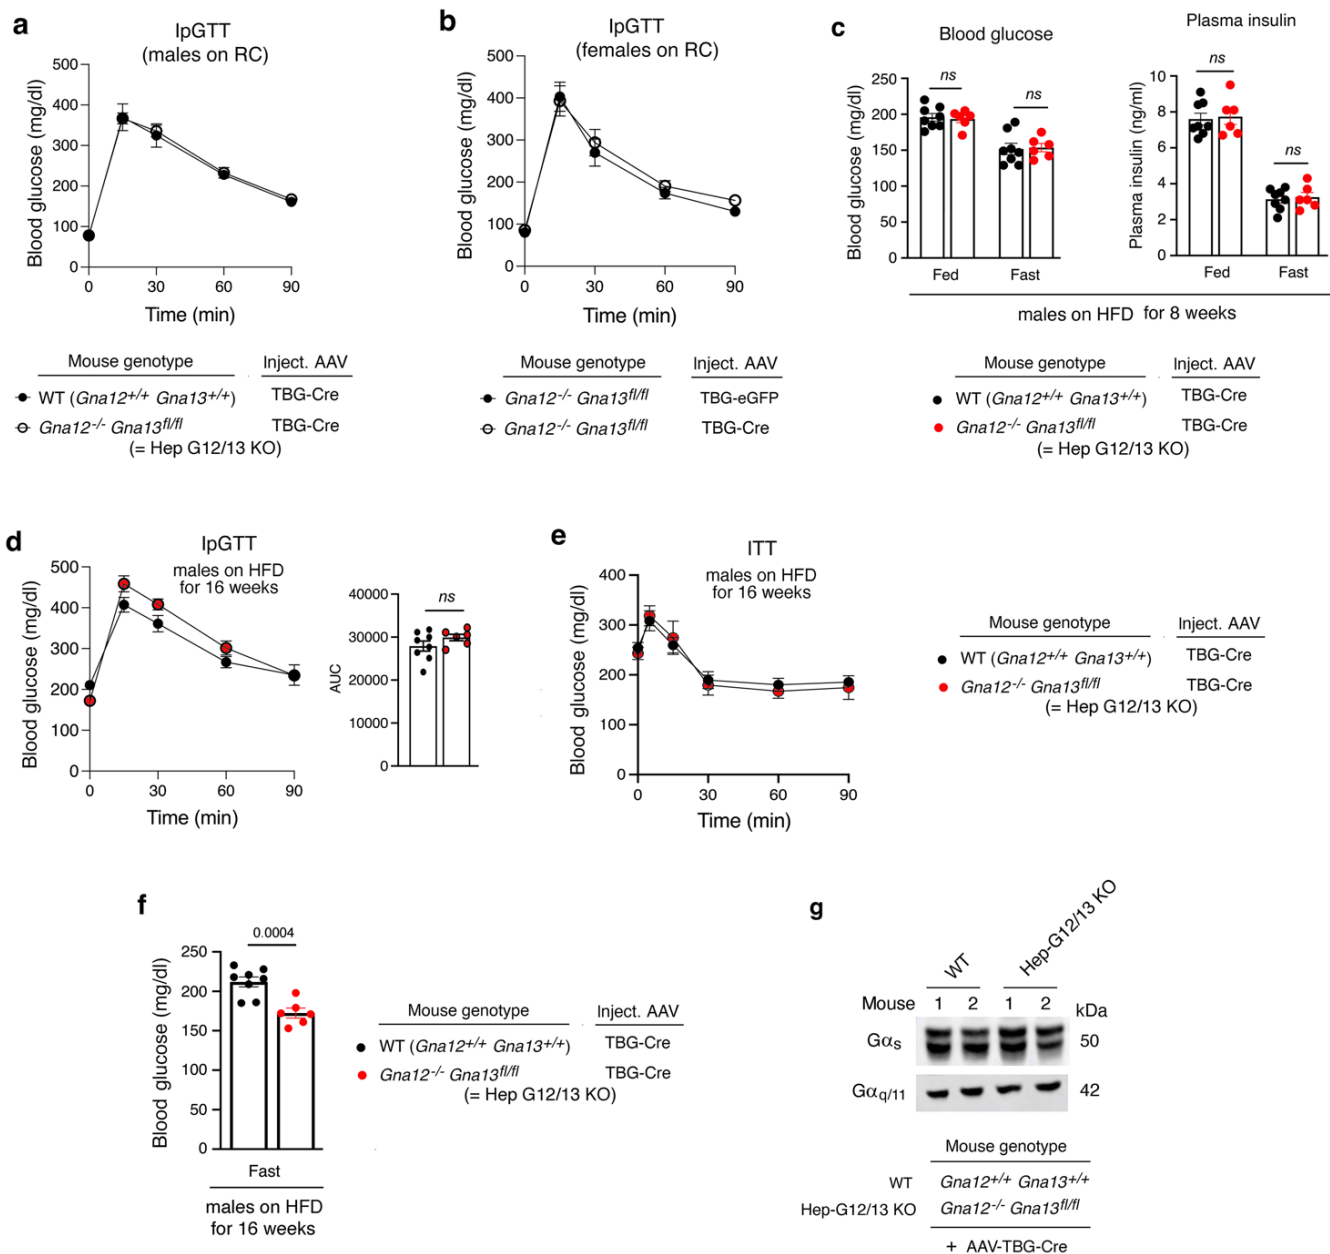

**Supplementary Fig. 16. Metabolic studies with mice lacking G<sub>12/13</sub> signaling in hepatocytes.**

**a**, IpGTT carried out with male mice of the indicated genotypes following treatment with the AAV-TGG-Cre virus (diet: regular chow [RC]; glucose dose: 2 g/kg). Mice were 12 weeks old when the experiment was performed (n=6-8 per group). **b**, IpGTT performed with female *Gna12<sup>-/-</sup> Gna13<sup>fl/fl</sup>* mice treated with either the AAV-TGB-eGFP control virus or with AAV-TGG-Cre (diet: RC; glucose dose: 2 g/kg; mouse age: 16 weeks; n=5 per group). **c**, Fed and fasting (14 hr overnight fast) blood glucose and plasma insulin levels of male mice maintained on a high-fat

diet (HFD) for 8 weeks (n=6-8 per group). **d-f**, Metabolic studies performed with male mice maintained on a HFD for 16 weeks (n=6-8 per group). **d**, IpGTT (1 g glucose/kg, i.p.). **e**, ITT (1.5 U Humulin/kg, i.p.). **f**, Fasting blood glucose levels. **g**, Hepatic  $G\alpha_s$  and  $G\alpha_{q/11}$  protein expression levels remain unaltered in HepG12/13 KO mice (male mice maintained on a HFD for 16 weeks). Data represent means  $\pm$  s.e.m. Numbers above horizontal bars refer to p values (two-tailed Student's t test). ns, no statistically significant difference. Source data are provided as a Source Data file.

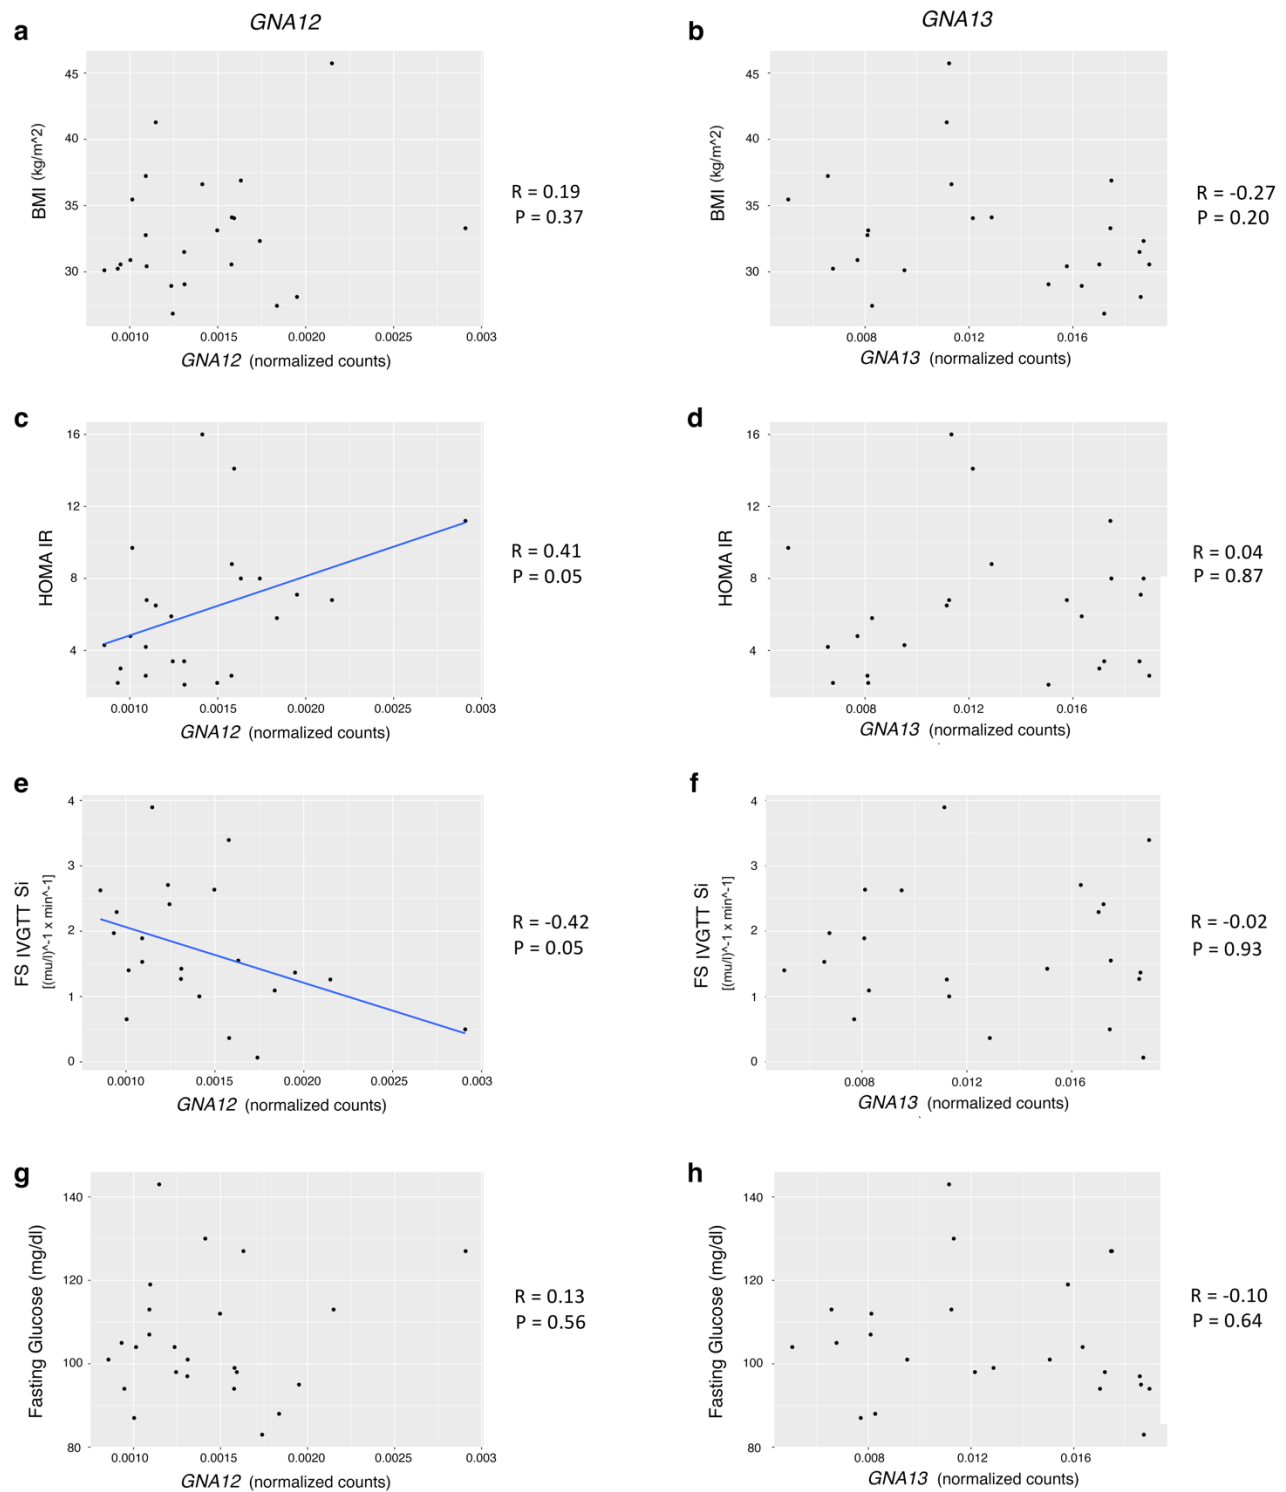

**Supplementary Fig. 17.** Correlation between hepatic *GNA12* and *GNA13* expression levels and markers of insulin resistance. Liver samples were obtained from human subjects with MASLD differing in glucose tolerance and insulin sensitivity (see Supplementary Table 3). Note that

*GNAI2* expression levels showed a positive correlation with HOMA-IR and a negative association with FS IVGTT Si. In contrast, *GNAI3* expression levels showed no correlation with any of the metabolic parameters analyzed. RNA expression levels were determined via RNAseq. Data were analyzed by Pearson correlations. BMI, body mass index; HOMA-IR, homeostatic model assessment for insulin resistance; FS IVGTT, frequently sampled intravenous glucose tolerance test; MASLD, metabolic dysfunction-associated steatotic liver disease; Si, insulin sensitivity index.

**Supplementary Table 1. Summary of antibodies, drugs, reagents, kits, and mouse strains used in this study**

| Reagent or Resource                           | Source                                       | Cat #               |
|-----------------------------------------------|----------------------------------------------|---------------------|
| <b>Antibodies</b>                             | (Dilution in parentheses)                    |                     |
| Mouse anti-G $\alpha_{12}$ antibody (E-12)    | Santa Cruz Biotechnology                     | sc-515445 (1: 2000) |
| Rabbit anti-G $\alpha_{13}$ antibody (6F6-B5) | Santa Cruz Biotechnology                     | sc-540292 (1: 2000) |
| Anti-mouse IgG, HRP-linked antibody           | Cell Signal Technology                       | 7076S (1: 5000)     |
| Anti-Rabbit IgG, HRP-linked antibody          | Cell Signal Technology                       | 7074S (1: 5000)     |
| Rabbit anti-ROCK1 antibody                    | Abcam                                        | Ab134181 (1: 2000)  |
| Rabbit anti-Phospho-SAPK/JNK antibody         | Cell Signal Technology                       | 4668S (1: 2000)     |
| Rabbit anti-SAPK/JNK antibody                 | Cell Signal Technology                       | 9252 (1: 2000)      |
| HA-Tag (C29F4) rabbit mAb                     | Cell Signal Technology                       | 3724 (1: 2000)      |
| Mouse anti- $\beta$ -actin antibody           | Cell Signaling                               | 3700 (1:5000)       |
| Rabbit anti-HA antibody                       | Cell Signaling                               | 3724 (1:2000)       |
| HA-Tag (6E2) mouse mAb (Alexa® 488 conjugate) | Cell Signaling                               | 2350s (1:200)       |
| Rabbit anti-phospho-FoxO1 antibody            | Cell Signal Technology                       | 9461S               |
| Rabbit anti- FoxO1 antibody                   | Cell Signal Technology                       | 2880S               |
| Rabbit anti-phospho-Akt antibody (T308)       | Cell Signal Technology                       | 2965S               |
| Rabbit anti-Akt antibody                      | Cell Signal Technology                       | 2938S               |
| Rabbit anti-phospho-GSK3 $\beta$ antibody     | Cell Signal Technology                       | 9336S               |
| Rabbit anti-GSK3 $\beta$ antibody             | Cell Signal Technology                       | 9315S               |
| Rabbit anti-phospho-GS antibody (S641)        | Abcam                                        | AB81230             |
| Rabbit anti-GS antibody                       | Abcam                                        | AB40810             |
| Rabbit anti-phospho-PYGL antibody (S15)       | Abcam                                        | AB227043            |
| Rabbit anti-PYGL antibody                     | Abcam                                        | AB198268            |
| Mouse anti-G $\alpha_q$ antibody              | BD Biosciences                               | 612704              |
| Rabbit anti-G $\alpha_s$ antibody             | generated in the lab of Dr. Lee S. Weinstein |                     |
| Rabbit anti-phospho-IRS-1 antibody (Ser307)   | Cell Signaling                               | 2381                |
| Rabbit anti-IRS-1 antibody                    | Cell Signaling                               | 2382                |
|                                               |                                              |                     |
|                                               |                                              |                     |

| <b>Compounds</b>                                    |                          |                  |
|-----------------------------------------------------|--------------------------|------------------|
| Glucagon                                            | Sigma Aldrich            | G2044            |
| Ponesimod                                           | TargetMol                | T3258            |
| SP 600125                                           | Tocris Bioscience        | 1496             |
| Y-27632 dihydrochloride                             | Tocris Bioscience        | 1254             |
| Rhosin hydrochloride                                | Tocris Bioscience        | 5003             |
| Bovine serum albumin (fatty acid-free)              | MilliporeSigma           | A7030            |
| Collagenase from <i>Clostridium histolyticum</i>    | MilliporeSigma           | C7657            |
| cOmplete, EDTA-free protease inhibitor cocktail     | MilliporeSigma           | 11697498001      |
| RIPA buffer                                         | Alfa Aesar               | AAJ63306AP       |
| EGTA Buffer 0.5 M, pH 8.0                           | MilliporeSigma           | 50-255-956       |
| Trypsin 0.25% plus 1 mM EDTA                        | MilliporeSigma           | SM2003C          |
| W146 trifluoroacetate                               | MedChemExpress LLC       | HY-101395A       |
| ECL Western blotting substrate                      | Thermo Fisher Scientific | 32106            |
| PhosSTOP™ (phosphatases inhibitor)                  | MilliporeSigma           | 4906845001       |
| Human insulin (Humulin R U-100)                     | Eli Lilly                | NDC 0002-8215-17 |
| Percoll                                             | Sigma Aldrich            | P8761            |
| Gibco DMEM, no glucose                              | Thermo Fisher Scientific | A1443001         |
| Gibco DMEM, low glucose                             | Thermo Fisher Scientific | 11054020         |
| Gibco DMEM, high glucose                            | Thermo Fisher Scientific | 10313039         |
| Tween 20                                            | Fisher Scientific        | P7949            |
| TRIzol                                              | Invitrogen               | 15596026         |
| UK 432097                                           | Axon Medchem             | 1193             |
| SuperSignal™ West Dura Substrate                    | Thermo Fisher Scientific | 34076            |
|                                                     |                          |                  |
| <b>Kits</b>                                         |                          |                  |
| Ultra-Sensitive Mouse Insulin ELISA kit             | Crystal Chem             | 90082            |
| Glucose (HK) assay kit                              | Sigma Aldrich            | GAHK20           |
| ON-TARGETplus Mouse Gna12 (14673) siRNA - SMARTpool | Horizon Discovery        | L-043467-00-0005 |
| ON-TARGETplus Non-targeting Pool                    | Horizon Discovery        | D-001810-10-05   |
| Glycogen phosphorylase colorimetric assay kit       | BioVision                | K179             |
| GSK3β assay kit                                     | BPS Bioscience           | 79700            |

|                                                     |                                                                                                 |                  |
|-----------------------------------------------------|-------------------------------------------------------------------------------------------------|------------------|
| ROCK activity assay kit                             | Sigma Aldrich                                                                                   | CSA001           |
| BCA protein assay kit                               | Thermo Fisher Scientific                                                                        | 23225            |
| Glucose 6 phosphate assay kit, colorimetric         | Novus Biologicals                                                                               | NBP3-24492       |
| cAMP, Biotrak™ EIA System                           | GE HealthCare                                                                                   | RPN225           |
|                                                     |                                                                                                 |                  |
| <b>Experimental Models: Mouse Strains</b>           |                                                                                                 |                  |
| C57BL/6N mice (WT mice)                             | Taconic                                                                                         | C57BL/6NTac      |
| <i>ROSA26-LSL-G12D-IRES-GFP</i> mice                | Source: Dr. Asuka Inoue                                                                         | Ref <sup>1</sup> |
| <i>Jnk1/2 fl/fl</i> mice                            | Source: Dr. Roger Davis                                                                         | Ref <sup>4</sup> |
| <i>Rock1 fl/fl</i> mice                             | Source: Dr. Young-Bum Kim                                                                       | Ref <sup>5</sup> |
| <i>Gna12</i> <sup>-/-</sup> <i>Gna13 fl/fl</i> mice | from Dr. Stefan Offermanns                                                                      | Ref <sup>6</sup> |
| <i>Gna13 fl/fl</i> mice                             | generated at NIDDK in the Wess section from <i>Gna12</i> <sup>-/-</sup> <i>Gna13 fl/fl</i> mice |                  |
|                                                     |                                                                                                 |                  |
| <b>Adeno-associated viruses and adenoviruses</b>    |                                                                                                 |                  |
| AAV.TBG.PI.Cre.rBG                                  | Addgene                                                                                         | 107787-AAV8      |
| AAV.TBG.PI.eGFP.WPRE.bGH                            | Addgene                                                                                         | 105535-AAV8      |
| Ad-CMV-eGFP                                         | Vector Biolabs                                                                                  | Custom order     |
| Ad-CMV-HA-G12D                                      | Vector Biolabs                                                                                  | Custom order     |



**Supplementary Table 2. Primers and TaqMan reagents used for PCR/qRT-PCR experiments**

| <b>Gene</b>  | <b>Forward primer (5'-3')</b> | <b>Reverse primer (5'-3')</b> |
|--------------|-------------------------------|-------------------------------|
| <i>G6pc</i>  | AGGTCGTGGCTGGAGTCTTGTC        | GTAGCAGGTAGAATCCAAGCGC        |
| <i>Fbp1</i>  | TGCTGAAGTCGTCCTACGCTAC        | TTCCGATGGACACAAGGCAGTC        |
| <i>Pck</i>   | GGCGATGACATTGCCTGGATGA        | TGTCTTCACTGAGGTGCCAGGA        |
| <i>G12D</i>  | GTACCACCGATGACCCTCTG          | CCAGGATGTTGCCGATGATG          |
| <i>Gcgr</i>  | CAATGCCACCACAACCTAAGCC        | GGCAGGAAATGTTGGCAGTGGT        |
| <i>Avr1a</i> | CATCCTCTGCTGGACACCTTTC        | TCAAGGAAGCCAGTAACGCCGT        |
| <i>Slp1r</i> | CGCAGTTCTGAGAAGTCTCTGG        | GGATGTCACAGGTCTTCGCCTT        |
| <i>Gpr91</i> | CCATCTCTGACTTTGCTTTCCTG       | GTGTAGAGGTTGGTGTGAAGCAC       |

| <b>Gene symbol</b> | <b>Encoded protein</b>                                 | <b>TaqMan Assay ID</b> |
|--------------------|--------------------------------------------------------|------------------------|
| <i>Gna12</i>       | G $\alpha$ <sub>12</sub>                               | Hs04992528_s1          |
| <i>Gna13</i>       | G $\alpha$ <sub>13</sub>                               | Hs00183573_m1          |
| <i>Rock1</i>       | Rho associated coiled-coil containing protein kinase 1 | Hs01127701_m1          |
| <i>Rock2</i>       | Rho associated coiled-coil containing protein kinase 2 | Hs00178154_m1          |
| <i>RhoA</i>        | Ras homolog family member A (RhoA)                     | Hs00357608_m1          |
| <i>Jnk1</i>        | c-Jun N-terminal kinase 1                              | Ce02407570_m1          |

**Supplementary Table 3. Characteristics of human subjects from which liver biopsy samples were obtained**

|                                                           |          |
|-----------------------------------------------------------|----------|
| Age [years]                                               | 49±12    |
| Male Sex [n, %]                                           | 14 (58%) |
| Race/Ethnicity                                            |          |
| White                                                     | 8 (33%)  |
| Hispanic                                                  | 15 (63%) |
| Asian                                                     | 1 (4%)   |
| BMI [kg/m <sup>2</sup> ]                                  | 32.8±4.4 |
| Hemoglobin A1c [%]                                        | 5.7±0.4  |
| HOMA-IR                                                   | 6.3±3.7  |
| Si Insulin Sensitivity Index                              | 1.7±1    |
| Histological Steatosis Score (median, range) <sup>1</sup> | 1 (0-3)  |
| NAFLD Activity Score (NAS) (median, range) <sup>a</sup>   | 3 (1-6)  |

<sup>a</sup>Scored according to Kleiner et al.<sup>7</sup>.

Data are given as means± s.d. (n=24). Abbreviations used: BMI, body mass index; HOMA-IR, homeostatic model assessment for insulin resistance; NAFLD, non-alcoholic fatty liver disease.

References

1. Ono, Y., *et al.* Chemogenetic activation of G(12) signaling enhances adipose tissue browning. *Signal Transduct Target Ther* **8**, 307 (2023).
2. Inoue, A., *et al.* Illuminating G-protein-coupling selectivity of GPCRs. *Cell* **177**, 1933-1947.e1925 (2019).
3. Armbruster, B.N., Li, X., Pausch, M.H., Herlitze, S. & Roth, B.L. Evolving the lock to fit the key to create a family of G protein-coupled receptors potently activated by an inert ligand. *Proc Natl Acad Sci U S A* **104**, 5163-5168 (2007).
4. Han, M.S., *et al.* JNK Expression by macrophages promotes obesity-induced insulin resistance and inflammation. *Science* **339**, 218-222 (2013).

5. Huang, H., *et al.* Rho-kinase regulates energy balance by targeting hypothalamic leptin receptor signaling. *Nat Neurosci* **15**, 1391-1398 (2012).
6. Wirth, A., *et al.* G12-G13-LARG-mediated signaling in vascular smooth muscle is required for salt-induced hypertension. *Nat Med* **14**, 64-68 (2008).
7. Kleiner, D.E., *et al.* Design and validation of a histological scoring system for nonalcoholic fatty liver disease. *Hepatology* **41**, 1313-1321 (2005).
